# Supplementary material for: Genetic Diversity and Genome-Wide Association in Cowpeas (Vigna unguiculata L. Walp)
Source: MDPI journal article supplement (doi:10.3390/agronomy14050961), 2024-05-02
Supplement: s1 [file s1]

**Supplemental Table 1.** Plant introduction (PI) and advanced line (CB, IT, TV, UCR) genotypes of cowpea (*Vigna unguiculata*) used in this study.

|           |           |           |           |             |
|-----------|-----------|-----------|-----------|-------------|
| PI 115679 | PI 152195 | PI 527277 | PI 583106 | PI 215659   |
| PI 115681 | PI 152196 | PI 527282 | PI 583108 | PI 271258   |
| PI 121433 | PI 152197 | PI 527286 | PI 583110 | PI 353045   |
| PI 145198 | PI 154134 | PI 527299 | PI 583112 | PI 353074   |
| PI 147077 | PI 162924 | PI 527302 | PI 583154 | PI 406985   |
| PI 147561 | PI 162925 | PI 527561 | PI 583160 | PI 419005   |
| PI 147563 | PI 163142 | PI 527563 | PI 583164 | PI 419102   |
| PI 148674 | PI 163448 | PI 527565 | PI 583167 | PI 419165   |
| PI 151562 | PI 165486 | PI 527675 | PI 583170 | PI 430687   |
| PI 184952 | PI 166146 | PI 580623 | PI 583174 | PI 478396   |
| PI 185647 | PI 167024 | PI 580867 | PI 583182 | PI 487486   |
| PI 186386 | PI 170869 | PI 580978 | PI 583190 | PI 487502   |
| PI 186460 | PI 174411 | PI 582343 | PI 583195 | PI 487507   |
| PI 186465 | PI 175327 | PI 582344 | PI 583198 | PI 487516   |
| PI 186466 | PI 175332 | PI 582347 | PI 583205 | PI 487519   |
| PI 189230 | PI 177579 | PI 582351 | PI 583207 | PI 487527   |
| PI 189375 | PI 179125 | PI 582366 | PI 583209 | PI 487532   |
| PI 189378 | PI 183251 | PI 582368 | PI 583219 | PI 487534   |
| PI 194203 | PI 183363 | PI 582415 | PI 583222 | PI 487539   |
| PI 194204 | PI 293528 | PI 582419 | PI 583224 | PI 487549   |
| PI 194205 | PI 300171 | PI 582428 | PI 583225 | PI 487550   |
| PI 194206 | PI 300173 | PI 582474 | PI 583226 | PI 490770   |
| PI 194207 | PI 300174 | PI 582512 | PI 583228 | PI 578902   |
| PI 194208 | PI 300175 | PI 582530 | PI 583229 | PI 468104   |
| PI 194209 | PI 304150 | PI 582542 | PI 583230 | PI 487523   |
| PI 194210 | PI 307556 | PI 582554 | PI 583232 | PI 291384   |
| PI 194211 | PI 307559 | PI 582565 | PI 583234 | PI 189416   |
| PI 194212 | PI 307561 | PI 582566 | PI 583235 | PI 304164   |
| PI 194213 | PI 311119 | PI 582567 | PI 583236 | PI 205140   |
| PI 197056 | PI 311226 | PI 582572 | PI 583238 | PI 205139   |
| PI 197057 | PI 312203 | PI 582576 | PI 583240 | PI 255755   |
| PI 200867 | PI 312207 | PI 582578 | PI 583242 | PI 250238   |
| PI 205141 | PI 312211 | PI 582579 | PI 583244 | PI 270065   |
| PI 205241 | PI 326157 | PI 582581 | PI 583245 | PI 180494   |
| PI 208771 | PI 337044 | PI 582678 | PI 583246 | PI 180355   |
| PI 208845 | PI 337506 | PI 582697 | PI 583248 | PI 180014   |
| PI 209971 | PI 339563 | PI 582701 | PI 583250 | PI 201498   |
| PI 211109 | PI 339588 | PI 582707 | PI 583252 | PI 167284   |
| PI 214354 | PI 339600 | PI 582718 | PI 583254 | UCR 2563    |
| PI 220850 | PI 339607 | PI 582729 | PI 583258 | UCR-1115    |
| PI 221732 | PI 339609 | PI 582785 | PI 583259 | TVu 7778    |
| PI 222755 | PI 339610 | PI 582789 | PI 583261 | PI 418979   |
| PI 225922 | PI 339613 | PI 582793 | PI 583262 | UCR 707     |
| PI 229734 | PI 339638 | PI 582805 | PI 583263 | UCR 5301    |
| PI 250587 | PI 339709 | PI 582820 | PI 583487 | IT97K-461-4 |
| PI 255765 | PI 352762 | PI 582825 | PI 583502 | CB46        |
| PI 255774 | PI 353001 | PI 582858 | PI 583513 | IT982E-18   |
| PI 255782 | PI 353125 | PI 582867 | PI 583550 | CB27        |
| PI 255811 | PI 353199 | PI 582878 | PI 583551 | IT84S-2049  |
| PI 255815 | PI 353278 | PI 582879 | PI 593117 | IT93K503-1  |
| PI 262179 | PI 354466 | PI 582880 | PI 599213 | PI 293478   |
| PI 277786 | PI 354524 | PI 582881 | PI 610520 | PI 583259   |
| PI 279845 | PI 354687 | PI 582894 | PI 610533 | IT95M-190   |
| PI 291139 | PI 354864 | PI 582912 | PI 610604 | PI 582393   |
| PI 291140 | PI 354881 | PI 582913 | PI 610620 | IT82E-18    |
| PI 292894 | PI 358307 | PI 582922 | PI 610621 | PI 579815   |
| PI 292899 | PI 358715 | PI 582923 | PI 253428 | PI 447634   |
| PI 292908 | PI 358716 | PI 582924 | PI 339592 | PI 215659   |
| PI 292912 | PI 367921 | PI 582931 | PI 448427 | PI 583550   |
| PI 292913 | PI 367927 | PI 582942 | PI 448499 | PI 583494   |
| PI 293453 | PI 382107 | PI 582943 | PI 448558 | PI 580290   |
| PI 293466 | PI 382121 | PI 582949 | PI 448702 | TVu-10179   |
| PI 293468 | PI 382124 | PI 582951 | PI 487518 | TVu-4760    |
| PI 293470 | PI 382128 | PI 582952 | PI 448806 | TVu-8713    |
| PI 293476 | PI 382135 | PI 582959 | PI 449161 | TVu-6644    |
| PI 293477 | PI 390421 | PI 582965 | PI 449218 | TVu-10754   |
| PI 293494 | PI 390831 | PI 582970 | PI 582469 | TVu-13939   |
| PI 293498 | PI 406290 | PI 582984 | PI 582531 | TVu-14533   |
| PI 293505 | PI 447582 | PI 583051 | PI 583098 | TVu-9234    |
| PI 293514 | PI 448112 | PI 583068 | PI 583156 | TVu-9474    |
| PI 293520 | PI 448144 | PI 583096 | PI 406365 | TVu-9469    |
| PI 293525 | PI 448192 | PI 583100 | PI 146618 | TVu-7991    |
| PI 293526 | PI 527259 | PI 583102 | PI 147071 | TVu-9506    |
| PI 152194 | PI 527263 | PI 583104 | PI 196301 | TVu-3830    |
